# Supplementary material for: Kilogram-scale high-yield production of PbI2 microcrystals for optimized photodetectors
Source: Royal Society of Chemistry journal article supplement (doi:10.1039/d4tc00966e), 2024-01-01
Supplement: d4tc00966e1.pdf [file d4tc00966e1.pdf]

## **Kilogram-scale high yield production of PbI<sub>2</sub> microcrystals for optimized photodetector**

Huiru Sun<sup>a</sup>, Longxing Su<sup>\*b</sup>, Qiang Zeng<sup>c</sup>, Yuan Pan<sup>a</sup>, Zhenshan Guo<sup>d</sup>,  
Kang An<sup>a</sup>, Zhonghui Xia<sup>a</sup>, Zibin Huang<sup>a</sup>, Fangyang Liu<sup>\*c</sup>, and Hongyu  
Chen<sup>\*a</sup>

---

<sup>a</sup> *School of Semiconductor Science and Technology, South China Normal University,  
Guangzhou 510631, China*

<sup>b</sup> *International School of Microelectronics, Dongguan University of Technology,  
Dongguan 523808, China*

<sup>c</sup> *School of Metallurgy and Environment, Central South University, Changsha  
410083, China*

<sup>d</sup> *College of Materials Science and Engineering, Taiyuan University of Technology,  
Taiyuan 030024, China*

*\* Authors to whom correspondence should be addressed: [sulongxing@dgut.edu.cn](mailto:sulongxing@dgut.edu.cn)  
(L. Su), [liufangyang@csu.edu.cn](mailto:liufangyang@csu.edu.cn) (F. Liu), [chenhy@m.scnu.edu.cn](mailto:chenhy@m.scnu.edu.cn) (H. Y. Chen)*

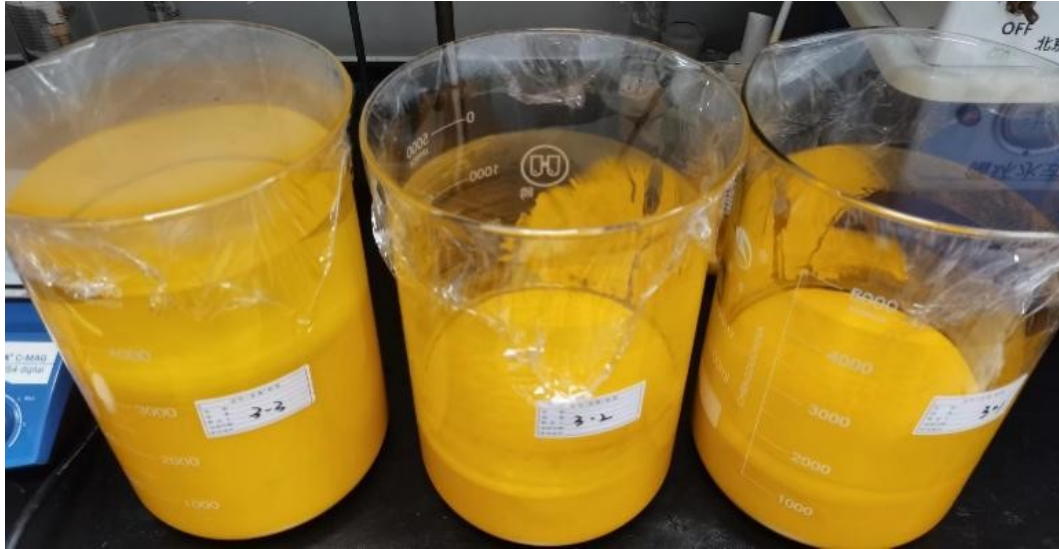

**Fig. S1.** The photograph of PbI<sub>2</sub> production at kilogram class.

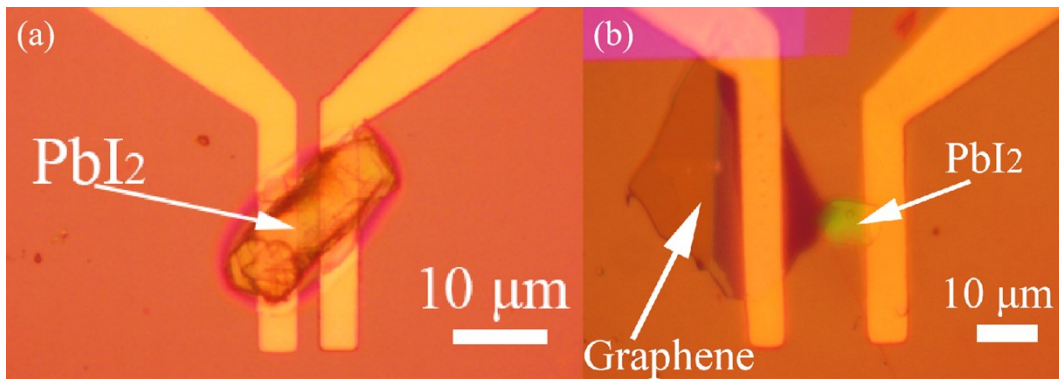

**Fig. S2.** The optical images of a) Au-PbI<sub>2</sub>-Au and b) Au-PbI<sub>2</sub>-Graphene photodetectors.

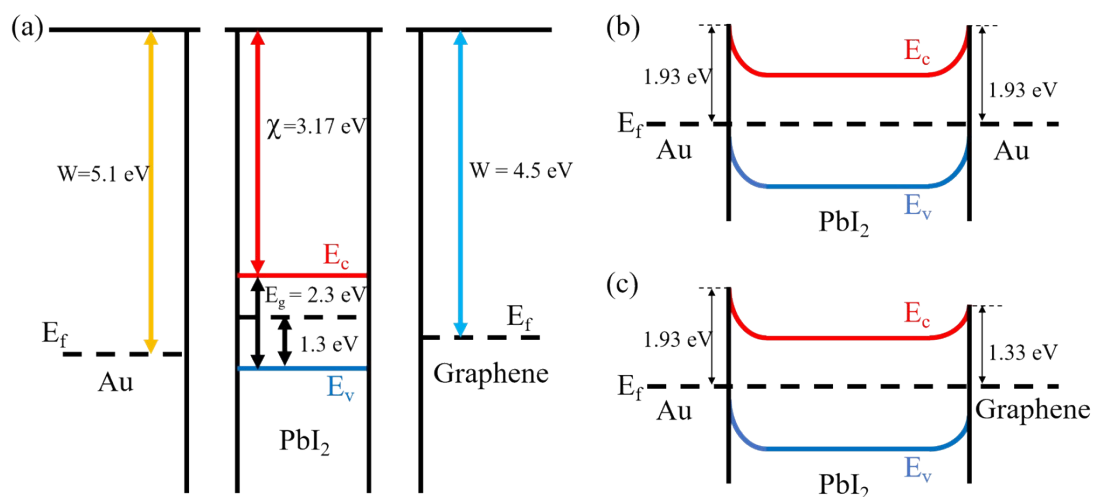

**Fig. S3.** a) The energy levels of Au, PbI<sub>2</sub>, and Graphene relative to vacuum level; The schematic energy diagrams of the b) Au-PbI<sub>2</sub>-Au and c) Au-PbI<sub>2</sub>-Graphene photodetectors under equilibrium condition at 0 V.

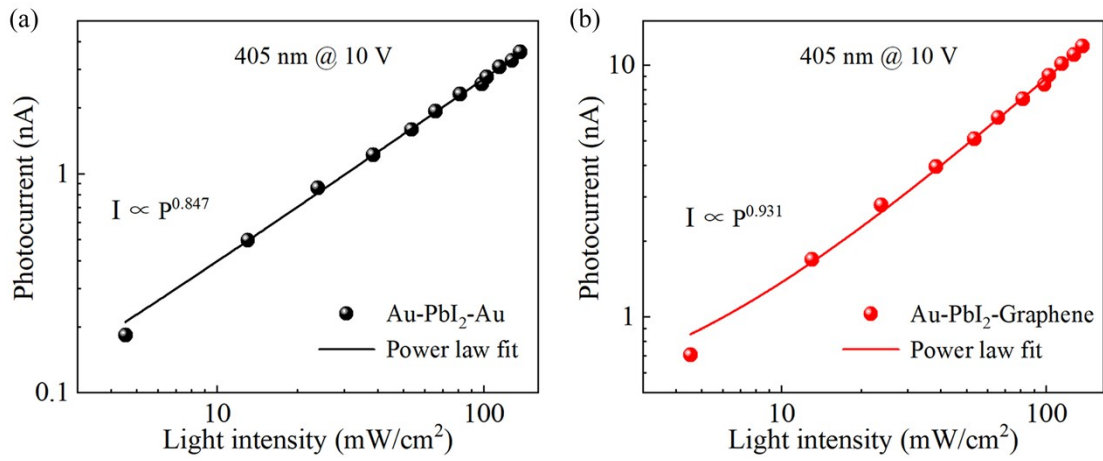

**Fig. S4.** The light-intensity-dependent photocurrents of the a) Au-PbI<sub>2</sub>-Au and b) Au-PbI<sub>2</sub>-Graphene devices.

**Table S1.** The performance parameters of PbI<sub>2</sub> based photodetectors.

| Morphology     | Bias<br>(V) | On/off<br>ratio | Rise/decay<br>time       | Responsivity<br>(A/W) | Detectivity<br>(Jones) | Ref.      |
|----------------|-------------|-----------------|--------------------------|-----------------------|------------------------|-----------|
| Microcrystal   | 10          | 13435           | 31 ms/31 ms              | 0.314                 | $3.23 \times 10^{11}$  | This work |
| Nanosheet      | 5           | 900             | 13.5 ms/20 ms            | 0.72                  | $1.04 \times 10^{10}$  | S1        |
| Nanosheet      | 10          | -               | -                        | 0.0013                | -                      | S2        |
| Single crystal | 10          | 14700           | 323 $\mu$ s/ 520 $\mu$ s | 0.18                  | $3.23 \times 10^{11}$  | S3        |
| Nanosheet      | 5           | 42              | 86 /150 ms               | 0.41                  | $3.1 \times 10^{11}$   | S4        |
| Single crystal | 15          | 519             | 354 ms/-                 | 11.3                  | -                      | S5        |
| Nanosheet      | 1.9         | -               | 55 $\mu$ s/110 $\mu$ s   | 0.0001                | -                      | S6        |
| Nanosheet      | 5           | 1371            | 161.7 ms/192.1ms         | 0.04                  | $3.31 \times 10^{10}$  | S7        |
| Nanoflakes     | 5           | -               | 14.1 ms/31ms             | 0.51                  | $4.0 \times 10^{10}$   | S8        |
| Nanobelt       | 5           | 1000            | 425 ms/41 ms             | 0.013                 | -                      | S9        |

## References

- S1. Y. Wang, L. Gan, J. Chen, R. Yang, and T. Zhai, *Sci. Bull.* **2017**, *62*, 1654.
- S2. R. Frisenda, J. O. Island, J. L. Lado, E. Giovanelli, P. Gant, P. Nagler, S. Bange, J. M. Lupton, C. Schuller, A. J. Molina-Mendoza, L. Aballe, M. Foerster, T. Korn, M. Angel Nino, D. P. de Lara, E. M. Perez, J. Fernandez Rossier, and A. Castellanos-Gomez, *Nanotechnology* **2017**, *28*, 455703.
- S3. Q. Wei, B. Shen, Y. Chen, B. Xu, Y. Xia, J. Yin, and Z. Liu, *Mater. Lett.* **2017**, *193*, 101.
- S4. C. Lan, R. Dong, Z. Zhou, L. Shu, D. Li, S. Yip, and J. C. Ho, *Adv. Mater.* **2017**, *29*, 1702759.
- S5. J. Zhang, T. Song, Z. Zhang, K. Ding, F. Huang, and B. Sun, *J. Mater. Chem. C* **2015**, *3*, 4402.
- S6. W. Zheng, Z. Zhang, R. Lin, K. Xu, J. He, and F. Huang, *Adv. Electron. Mater.* **2016**, *2*, 1600291.
- S7. R. Wang, S. Li, P. Wang, J. Xiu, G. Wei, M. Sun, Z. Li, Y. Liu, and M. Zhong, *J. Phys. Chem. C* **2019**, *123*, 9609.
- S8. H. Xiao, T. Liang, and M. Xu, *Small* **2019**, *15*, 1901767.
- S9. M. Han, J. Sun, L. Bian, Z. Wang, L. Zhang, Y. Yin, Z. Gao, F. Li, Q. Xin, L. He, N. Han, A. Song, and Z. X. Yang, *J. Mater. Chem. C* **2018**, *6*, 5746.
